# Supplementary material
Source: PubMed Central journal article supplement (PMC4993696)
Supplement: NIHMS766738-supplement-Supp_Info.pdf [file NIHMS766738-supplement-Supp_Info.pdf]

# Supporting Web Material for

Identifying a maximum tolerated contour in two-dimensional dose-finding

by Nolan A. Wages

Table 1: Proportion of recommendation and experimentation, allowing for shifts of 4 or more. Results for Scenarios I–III are based on 21 possible working models, and results for Scenarios IV–VI are based on 6 working models (allowing for shifts 0–5 between each row). The target toxicity rate is  $\phi = 0.20$ . The total sample size is  $N = 54$  in Scenarios I–III, and  $N = 36$  in Scenarios IV–VI.

| Scenario |   | Recommendation |             |             |             |             |             | Experimentation |             |             |             |             |             |
|----------|---|----------------|-------------|-------------|-------------|-------------|-------------|-----------------|-------------|-------------|-------------|-------------|-------------|
|          |   | 1              | 2           | 3           | 4           | 5           | 6           | 1               | 2           | 3           | 4           | 5           | 6           |
| I        | 3 | 0.38           | <b>0.41</b> | 0.19        | 0.02        | 0.00        | 0.00        | 0.12            | <b>0.09</b> | 0.06        | 0.02        | 0.01        | 0.00        |
|          | 2 | 0.06           | 0.33        | <b>0.42</b> | 0.15        | 0.03        | 0.00        | 0.05            | 0.09        | <b>0.10</b> | 0.05        | 0.02        | 0.01        |
|          | 1 | 0.00           | 0.04        | 0.18        | 0.29        | <b>0.29</b> | 0.19        | 0.03            | 0.04        | 0.07        | 0.09        | <b>0.08</b> | 0.08        |
| II       | 3 | 0.02           | 0.07        | 0.17        | 0.28        | <b>0.30</b> | 0.16        | 0.02            | 0.02        | 0.03        | 0.05        | <b>0.07</b> | 0.05        |
|          | 2 | 0.00           | 0.01        | 0.07        | 0.20        | <b>0.35</b> | 0.37        | 0.02            | 0.02        | 0.04        | 0.06        | <b>0.08</b> | 0.10        |
|          | 1 | 0.00           | 0.00        | 0.02        | 0.10        | 0.25        | <b>0.63</b> | 0.02            | 0.02        | 0.03        | 0.05        | 0.07        | <b>0.17</b> |
| III      | 3 | <b>0.70</b>    | 0.25        | 0.05        | 0.01        | 0.00        | 0.00        | <b>0.19</b>     | 0.06        | 0.03        | 0.01        | 0.00        | 0.00        |
|          | 2 | 0.21           | <b>0.33</b> | 0.27        | 0.15        | 0.04        | 0.00        | 0.08            | <b>0.08</b> | 0.08        | 0.05        | 0.02        | 0.01        |
|          | 1 | 0.00           | 0.05        | 0.22        | <b>0.35</b> | 0.26        | 0.12        | 0.03            | 0.04        | 0.08        | <b>0.10</b> | 0.08        | 0.06        |
| IV       | 2 | 0.12           | 0.25        | <b>0.36</b> | 0.22        | 0.05        | 0.00        | 0.11            | 0.10        | <b>0.12</b> | 0.08        | 0.03        | 0.01        |
|          | 1 | 0.01           | 0.09        | 0.29        | <b>0.36</b> | 0.20        | 0.06        | 0.06            | 0.07        | 0.13        | <b>0.14</b> | 0.10        | 0.06        |
| V        | 2 | 0.19           | 0.28        | <b>0.33</b> | 0.17        | 0.03        | 0.00        | 0.12            | 0.10        | <b>0.11</b> | 0.07        | 0.03        | 0.01        |
|          | 1 | 0.00           | 0.03        | 0.15        | 0.30        | <b>0.30</b> | 0.23        | 0.04            | 0.05        | 0.09        | 0.12        | <b>0.12</b> | 0.12        |
| VI       | 2 | <b>0.70</b>    | 0.24        | 0.06        | 0.00        | 0.00        | 0.00        | <b>0.30</b>     | 0.10        | 0.04        | 0.01        | 0.00        | 0.00        |
|          | 1 | 0.26           | <b>0.40</b> | 0.26        | 0.07        | 0.01        | 0.00        | 0.17            | <b>0.16</b> | 0.13        | 0.06        | 0.02        | 0.01        |

Table 2: Proportion of trials that correctly recommend 0, 1, 2, and 3 maximum tolerated dose combinations, allowing for shifts of 4 or more. These results are compared with those that only allow shifts of 3 or less.

| Scenario | Possible | 0    | 1    | 2    | 3    |
|----------|----------|------|------|------|------|
|          | Shifts   |      |      |      |      |
| I        | 0-3      | 0.17 | 0.46 | 0.32 | 0.05 |
|          | 0-5      | 0.19 | 0.51 | 0.26 | 0.03 |
| II       | 0-3      | 0.18 | 0.43 | 0.29 | 0.10 |
|          | 0-5      | 0.18 | 0.47 | 0.25 | 0.10 |
| III      | 0-3      | 0.11 | 0.41 | 0.40 | 0.08 |
|          | 0-5      | 0.11 | 0.47 | 0.35 | 0.07 |
| IV       | 0-3      | 0.38 | 0.52 | 0.10 | -    |
|          | 0-5      | 0.38 | 0.53 | 0.10 | -    |
| V        | 0-3      | 0.41 | 0.49 | 0.10 | -    |
|          | 0-5      | 0.47 | 0.44 | 0.09 | -    |
| VI       | 0-3      | 0.15 | 0.62 | 0.23 | -    |
|          | 0-5      | 0.14 | 0.62 | 0.24 | -    |

Table 3: Working models (skeletons)  $M_1$ – $M_8$  for Scenarios I–III used in manuscript.

| Model | Shift          | Skeleton values |             |             |             |             |      |
|-------|----------------|-----------------|-------------|-------------|-------------|-------------|------|
| $M_1$ | $\Delta_3 = 0$ | 0.03            | 0.07        | 0.13        | <b>0.20</b> | 0.29        | 0.38 |
|       | $\Delta_2 = 0$ | 0.03            | 0.07        | 0.13        | <b>0.20</b> | 0.29        | 0.38 |
|       |                | 0.03            | 0.07        | 0.13        | <b>0.20</b> | 0.29        | 0.38 |
| $M_2$ | $\Delta_3 = 1$ | 0.07            | 0.13        | <b>0.20</b> | 0.29        | 0.38        | 0.47 |
|       | $\Delta_2 = 0$ | 0.03            | 0.07        | 0.13        | <b>0.20</b> | 0.29        | 0.38 |
|       |                | 0.03            | 0.07        | 0.13        | <b>0.20</b> | 0.29        | 0.38 |
| $M_3$ | $\Delta_3 = 2$ | 0.13            | <b>0.20</b> | 0.29        | 0.38        | 0.47        | 0.55 |
|       | $\Delta_2 = 0$ | 0.03            | 0.07        | 0.13        | <b>0.20</b> | 0.29        | 0.38 |
|       |                | 0.03            | 0.07        | 0.13        | <b>0.20</b> | 0.29        | 0.38 |
| $M_4$ | $\Delta_3 = 3$ | <b>0.20</b>     | 0.29        | 0.38        | 0.47        | 0.55        | 0.63 |
|       | $\Delta_2 = 0$ | 0.03            | 0.07        | 0.13        | <b>0.20</b> | 0.29        | 0.38 |
|       |                | 0.03            | 0.07        | 0.13        | <b>0.20</b> | 0.29        | 0.38 |
| $M_5$ | $\Delta_3 = 0$ | 0.03            | 0.07        | 0.13        | <b>0.20</b> | 0.29        | 0.38 |
|       | $\Delta_2 = 1$ | 0.03            | 0.07        | 0.13        | <b>0.20</b> | 0.29        | 0.38 |
|       |                | 0.01            | 0.03        | 0.07        | 0.13        | <b>0.20</b> | 0.29 |
| $M_6$ | $\Delta_3 = 1$ | 0.07            | 0.13        | <b>0.20</b> | 0.29        | 0.38        | 0.47 |
|       | $\Delta_2 = 1$ | 0.03            | 0.07        | 0.13        | <b>0.20</b> | 0.29        | 0.38 |
|       |                | 0.01            | 0.03        | 0.07        | 0.13        | <b>0.20</b> | 0.29 |
| $M_7$ | $\Delta_3 = 2$ | 0.13            | <b>0.20</b> | 0.29        | 0.38        | 0.47        | 0.55 |
|       | $\Delta_2 = 1$ | 0.03            | 0.07        | 0.13        | <b>0.20</b> | 0.29        | 0.38 |
|       |                | 0.01            | 0.03        | 0.07        | 0.13        | <b>0.20</b> | 0.29 |
| $M_8$ | $\Delta_3 = 3$ | <b>0.20</b>     | 0.29        | 0.38        | 0.47        | 0.55        | 0.63 |
|       | $\Delta_2 = 1$ | 0.03            | 0.07        | 0.13        | <b>0.20</b> | 0.29        | 0.38 |
|       |                | 0.01            | 0.03        | 0.07        | 0.13        | <b>0.20</b> | 0.29 |

Table 4: Working models (skeletons)  $M_9$ – $M_{15}$  for Scenarios I–III used in manuscript.

| Model    | Shift          | Skeleton values |             |             |             |      |             |
|----------|----------------|-----------------|-------------|-------------|-------------|------|-------------|
| $M_9$    | $\Delta_3 = 0$ | 0.03            | 0.07        | 0.13        | <b>0.20</b> | 0.29 | 0.38        |
|          | $\Delta_2 = 2$ | 0.03            | 0.07        | 0.13        | <b>0.20</b> | 0.29 | 0.38        |
|          |                | 0.004           | 0.01        | 0.03        | 0.07        | 0.13 | <b>0.20</b> |
| $M_{10}$ | $\Delta_3 = 1$ | 0.07            | 0.13        | <b>0.20</b> | 0.29        | 0.38 | 0.47        |
|          | $\Delta_2 = 2$ | 0.03            | 0.07        | 0.13        | <b>0.20</b> | 0.29 | 0.38        |
|          |                | 0.004           | 0.01        | 0.03        | 0.07        | 0.13 | <b>0.20</b> |
| $M_{11}$ | $\Delta_3 = 2$ | 0.13            | <b>0.20</b> | 0.29        | 0.38        | 0.47 | 0.55        |
|          | $\Delta_2 = 2$ | 0.03            | 0.07        | 0.13        | <b>0.20</b> | 0.29 | 0.38        |
|          |                | 0.004           | 0.01        | 0.03        | 0.07        | 0.13 | <b>0.20</b> |
| $M_{12}$ | $\Delta_3 = 3$ | <b>0.20</b>     | 0.29        | 0.38        | 0.47        | 0.55 | 0.63        |
|          | $\Delta_2 = 2$ | 0.03            | 0.07        | 0.13        | <b>0.20</b> | 0.29 | 0.38        |
|          |                | 0.004           | 0.01        | 0.03        | 0.07        | 0.13 | <b>0.20</b> |
| $M_{13}$ | $\Delta_3 = 0$ | 0.07            | 0.13        | <b>0.20</b> | 0.29        | 0.38 | 0.47        |
|          | $\Delta_2 = 3$ | 0.07            | 0.13        | <b>0.20</b> | 0.29        | 0.38 | 0.47        |
|          |                | 0.004           | 0.01        | 0.03        | 0.07        | 0.13 | <b>0.20</b> |
| $M_{14}$ | $\Delta_3 = 1$ | 0.13            | <b>0.20</b> | 0.29        | 0.38        | 0.47 | 0.55        |
|          | $\Delta_2 = 3$ | 0.07            | 0.13        | <b>0.20</b> | 0.29        | 0.38 | 0.47        |
|          |                | 0.004           | 0.01        | 0.03        | 0.07        | 0.13 | <b>0.20</b> |
| $M_{15}$ | $\Delta_3 = 2$ | <b>0.20</b>     | 0.29        | 0.38        | 0.47        | 0.55 | 0.63        |
|          | $\Delta_2 = 3$ | 0.07            | 0.13        | <b>0.20</b> | 0.29        | 0.38 | 0.47        |
|          |                | 0.004           | 0.01        | 0.03        | 0.07        | 0.13 | <b>0.20</b> |

Table 5: Working models (skeletons) for Scenarios IV–VI used in manuscript.

| Model | Shift          | Skeleton values |             |             |             |      |      |
|-------|----------------|-----------------|-------------|-------------|-------------|------|------|
| $M_1$ | $\Delta_2 = 0$ | 0.05            | 0.11        | <b>0.20</b> | 0.31        | 0.42 | 0.53 |
|       |                | 0.05            | 0.11        | <b>0.20</b> | 0.31        | 0.42 | 0.53 |
| $M_2$ | $\Delta_2 = 1$ | 0.11            | <b>0.20</b> | 0.31        | 0.42        | 0.53 | 0.63 |
|       |                | 0.05            | 0.11        | <b>0.20</b> | 0.31        | 0.42 | 0.53 |
| $M_3$ | $\Delta_2 = 2$ | <b>0.20</b>     | 0.31        | 0.42        | 0.53        | 0.63 | 0.72 |
|       |                | 0.05            | 0.11        | <b>0.20</b> | 0.31        | 0.42 | 0.53 |
| $M_4$ | $\Delta_2 = 3$ | <b>0.20</b>     | 0.31        | 0.42        | 0.53        | 0.63 | 0.72 |
|       |                | 0.02            | 0.05        | 0.11        | <b>0.20</b> | 0.31 | 0.42 |

Table 6: Alternative working models (skeletons) for Scenarios IV–VI.

| Model | Shift          | Skeleton values |             |             |             |             |      |
|-------|----------------|-----------------|-------------|-------------|-------------|-------------|------|
| $M_1$ | $\Delta_2 = 0$ | 0.01            | 0.03        | 0.10        | <b>0.20</b> | 0.33        | 0.47 |
|       |                | 0.01            | 0.03        | 0.10        | <b>0.20</b> | 0.33        | 0.47 |
| $M_2$ | $\Delta_2 = 1$ | 0.03            | 0.10        | <b>0.20</b> | 0.33        | 0.47        | 0.60 |
|       |                | 0.01            | 0.03        | 0.10        | <b>0.20</b> | 0.33        | 0.47 |
| $M_3$ | $\Delta_2 = 2$ | 0.10            | <b>0.20</b> | 0.33        | 0.47        | 0.60        | 0.70 |
|       |                | 0.01            | 0.03        | 0.10        | <b>0.20</b> | 0.33        | 0.47 |
| $M_4$ | $\Delta_2 = 3$ | 0.10            | <b>0.20</b> | 0.33        | 0.47        | 0.60        | 0.70 |
|       |                | 0.001           | 0.01        | 0.03        | 0.10        | <b>0.20</b> | 0.33 |

Table 7: Alternative working models (skeletons) for Scenarios IV–VI.

| Model | Shift          | Skeleton values |      |             |             |             |             |
|-------|----------------|-----------------|------|-------------|-------------|-------------|-------------|
| $M_1$ | $\Delta_2 = 0$ | 0.004           | 0.01 | 0.03        | 0.07        | 0.13        | <b>0.20</b> |
|       |                | 0.004           | 0.01 | 0.03        | 0.07        | 0.13        | <b>0.20</b> |
| $M_2$ | $\Delta_2 = 1$ | 0.01            | 0.03 | 0.07        | 0.13        | <b>0.20</b> | 0.29        |
|       |                | 0.004           | 0.01 | 0.03        | 0.07        | 0.13        | <b>0.20</b> |
| $M_3$ | $\Delta_2 = 2$ | 0.03            | 0.07 | 0.13        | <b>0.20</b> | 0.29        | 0.38        |
|       |                | 0.004           | 0.01 | 0.03        | 0.07        | 0.13        | <b>0.20</b> |
| $M_4$ | $\Delta_2 = 3$ | 0.07            | 0.13 | <b>0.20</b> | 0.29        | 0.38        | 0.47        |
|       |                | 0.004           | 0.01 | 0.03        | 0.07        | 0.13        | <b>0.20</b> |

Table 8: Alternative working models (skeletons) for Scenarios IV–VI.

| Model | Shift          | Skeleton values |             |             |             |      |      |
|-------|----------------|-----------------|-------------|-------------|-------------|------|------|
| $M_1$ | $\Delta_2 = 0$ | <b>0.20</b>     | 0.29        | 0.37        | 0.47        | 0.55 | 0.63 |
|       |                | <b>0.20</b>     | 0.29        | 0.37        | 0.47        | 0.55 | 0.63 |
| $M_2$ | $\Delta_2 = 1$ | <b>0.20</b>     | 0.29        | 0.37        | 0.47        | 0.55 | 0.63 |
|       |                | 0.13            | <b>0.20</b> | 0.29        | 0.37        | 0.47 | 0.55 |
| $M_3$ | $\Delta_2 = 2$ | <b>0.20</b>     | 0.29        | 0.37        | 0.47        | 0.55 | 0.63 |
|       |                | 0.07            | 0.13        | <b>0.20</b> | 0.29        | 0.37 | 0.47 |
| $M_4$ | $\Delta_2 = 3$ | <b>0.20</b>     | 0.29        | 0.37        | 0.47        | 0.55 | 0.63 |
|       |                | 0.03            | 0.07        | 0.13        | <b>0.20</b> | 0.29 | 0.37 |

Table 9: Alternative working models (skeletons) for Scenarios IV–VI.

| Model | Shift          | Skeleton values |             |             |             |             |      |
|-------|----------------|-----------------|-------------|-------------|-------------|-------------|------|
| $M_1$ | $\Delta_2 = 0$ | 0.13            | <b>0.20</b> | 0.29        | 0.38        | 0.47        | 0.55 |
|       |                | 0.13            | <b>0.20</b> | 0.29        | 0.38        | 0.47        | 0.55 |
| $M_2$ | $\Delta_2 = 1$ | 0.13            | <b>0.20</b> | 0.29        | 0.38        | 0.47        | 0.55 |
|       |                | 0.07            | 0.13        | <b>0.20</b> | 0.29        | 0.38        | 0.47 |
| $M_3$ | $\Delta_2 = 2$ | 0.13            | <b>0.20</b> | 0.29        | 0.38        | 0.47        | 0.55 |
|       |                | 0.03            | 0.07        | 0.13        | <b>0.20</b> | 0.29        | 0.38 |
| $M_4$ | $\Delta_2 = 3$ | 0.13            | <b>0.20</b> | 0.29        | 0.38        | 0.47        | 0.55 |
|       |                | 0.01            | 0.03        | 0.07        | 0.13        | <b>0.20</b> | 0.29 |

Table 10: Proportion of trials that correctly recommend 0, 1, and 2 maximum tolerated dose combinations.

| Scenario | Working | 0    | 1    | 2    |
|----------|---------|------|------|------|
|          | Models  |      |      |      |
| IV       | Table 5 | 0.38 | 0.52 | 0.10 |
|          | Table 6 | 0.37 | 0.52 | 0.11 |
|          | Table 7 | 0.38 | 0.52 | 0.10 |
|          | Table 8 | 0.36 | 0.54 | 0.10 |
|          | Table 9 | 0.35 | 0.54 | 0.11 |
| V        | Table 5 | 0.41 | 0.49 | 0.10 |
|          | Table 6 | 0.37 | 0.52 | 0.11 |
|          | Table 7 | 0.39 | 0.52 | 0.09 |
|          | Table 8 | 0.41 | 0.50 | 0.09 |
|          | Table 9 | 0.41 | 0.51 | 0.08 |
| VI       | Table 5 | 0.15 | 0.62 | 0.23 |
|          | Table 6 | 0.16 | 0.60 | 0.24 |
|          | Table 7 | 0.14 | 0.62 | 0.23 |
|          | Table 8 | 0.12 | 0.64 | 0.23 |
|          | Table 9 | 0.13 | 0.63 | 0.24 |

Table 11: Three additional scenarios of true toxicity probabilities for  $2 \times 6$  drug combination matrices. The target toxicity rate is  $\phi = 0.20$  in each scenario. True maximum tolerated dose combinations are indicated in bold-type, and the set of maximum tolerated dose combinations forms a maximum tolerated contour. These scenarios represent very safe and very toxic cases.

| Scenario |   | 1           | 2    | 3    | 4    | 5    | 6           |
|----------|---|-------------|------|------|------|------|-------------|
| VII      | 2 | <b>0.22</b> | 0.32 | 0.40 | 0.56 | 0.65 | 0.74        |
|          | 1 | <b>0.16</b> | 0.28 | 0.35 | 0.43 | 0.55 | 0.67        |
| VIII     | 2 | 0.03        | 0.07 | 0.09 | 0.11 | 0.13 | <b>0.21</b> |
|          | 1 | 0.02        | 0.05 | 0.08 | 0.10 | 0.12 | <b>0.18</b> |
| IX       | 2 | 0.04        | 0.06 | 0.08 | 0.09 | 0.11 | <b>0.13</b> |
|          | 1 | 0.01        | 0.03 | 0.05 | 0.06 | 0.09 | <b>0.12</b> |

Table 12: Proportion of recommendation and experimentation for additional Scenarios VII–IX. The target toxicity rate is  $\phi = 0.20$ . The total sample size is  $N = 36$ .

| Scenario |   | Recommendation |      |      |      |      |             | Experimentation |      |      |      |      |             |
|----------|---|----------------|------|------|------|------|-------------|-----------------|------|------|------|------|-------------|
|          |   | 1              | 2    | 3    | 4    | 5    | 6           | 1               | 2    | 3    | 4    | 5    | 6           |
| VII      | 2 | <b>0.80</b>    | 0.17 | 0.03 | 0.01 | 0.00 | 0.00        | 0.34            | 0.07 | 0.03 | 0.01 | 0.00 | 0.00        |
|          | 1 | <b>0.49</b>    | 0.34 | 0.13 | 0.04 | 0.00 | 0.00        | 0.24            | 0.15 | 0.09 | 0.04 | 0.02 | 0.01        |
| VIII     | 2 | 0.01           | 0.05 | 0.11 | 0.16 | 0.28 | <b>0.39</b> | 0.05            | 0.05 | 0.07 | 0.08 | 0.09 | <b>0.16</b> |
|          | 1 | 0.00           | 0.00 | 0.04 | 0.07 | 0.19 | <b>0.70</b> | 0.04            | 0.04 | 0.05 | 0.06 | 0.09 | <b>0.23</b> |
| IX       | 2 | 0.00           | 0.03 | 0.07 | 0.12 | 0.15 | <b>0.62</b> | 0.04            | 0.04 | 0.06 | 0.06 | 0.07 | <b>0.24</b> |
|          | 1 | 0.00           | 0.00 | 0.01 | 0.04 | 0.08 | <b>0.88</b> | 0.03            | 0.03 | 0.04 | 0.05 | 0.06 | <b>0.26</b> |

Table 13: Proportion of trials that correctly recommend 0, 1, and 2 maximum tolerated dose combinations for additional scenarios VII, VIII, and IX.

| Scenario | 0    | 1    | 2    |
|----------|------|------|------|
| IV       | 0.20 | 0.32 | 0.49 |
| V        | 0.30 | 0.30 | 0.40 |
| VI       | 0.12 | 0.26 | 0.62 |
